# Supplementary material for: Photocatalytic dehydrogenation of ammonia borane over Ti3C2/MOF-supported Pd-doped Co nanoparticles
Source: Royal Society of Chemistry journal article supplement (doi:10.1039/d3nj04017h), 2023-01-01
Supplement: d3nj04017h1.pdf [file d3nj04017h1.pdf]

## Supplementary Information

### Photocatalytic dehydrogenation of ammonia borane over $\text{Ti}_3\text{C}_2/\text{MOF}$ -supported Pd-doped Co nanoparticles

Xiaodie Huang, Ziye Liu, Jingjing Tu, Changchun Ji, Ying-Hua Zhou\*

The Key Laboratory of Functional Molecular Solids, Ministry of Education, Anhui Laboratory of Molecule-Based Materials (State Key Laboratory Cultivation Base), College of Chemistry and Materials Science, Anhui Normal University, Wuhu, Anhui 241002, China

E-mail: yhzhou@ahnu.edu.cn

**Table S1** ICP-OES results of the refresh and used Co<sub>30</sub>Pd@TUNS.

|             | Pd (wt%) | Co (wt%) | n <sub>Co</sub> : n <sub>Pd</sub> |
|-------------|----------|----------|-----------------------------------|
| the refresh | 0.2724   | 4.6835   | ~30 :1                            |
| the used    | 0.2514   | 4.4521   | ~30 :1                            |

**Table S2** The calculated XPS elemental compositions in Ti<sub>3</sub>C<sub>2</sub>, TUNS and Co<sub>30</sub>Pd@TUNS

| Elemental % | atomic % | Ti <sub>3</sub> C <sub>2</sub> | TUNS  | Co <sub>30</sub> Pd@TUNS |
|-------------|----------|--------------------------------|-------|--------------------------|
| C1s         |          | 45.39                          | 41.41 | 45.83                    |
| Ti2p        |          | 30.69                          | 4.16  | 2.27                     |
| O1s         |          | 23.91                          | 45.11 | 41.29                    |
| Zr3d        |          | -                              | 4.25  | 2.89                     |
| N1s         |          | -                              | 5.07  | 1.92                     |
| Co2p        |          | -                              | -     | 5.73                     |
| Pd3d5       |          | -                              | -     | 0.05                     |

**Table S3** Turnover frequency (TOF) and activation energy ( $E_a$ ) values of Co-based catalysts for dehydrogenation of ammonia borane at 298 K.

| Catalyst                                                | TOF ( $\text{mol}_{\text{H}_2} \cdot \text{mol}_{\text{metal}}^{-1} \cdot \text{min}^{-1}$ ) | $E_a$ ( $\text{kJ} \cdot \text{mol}^{-1}$ ) | Ref.      |
|---------------------------------------------------------|----------------------------------------------------------------------------------------------|---------------------------------------------|-----------|
| Co/PEI-GO <sup>a</sup>                                  | 39.9                                                                                         | 28.2                                        | [S1]      |
| Co/MXene                                                | 12.5                                                                                         | 33.05                                       | [S2]      |
| Cu <sub>0.8</sub> Co <sub>0.2</sub> O/GO                | 70.0                                                                                         | 45.53                                       | [S3]      |
| rGO-Co <sub>70</sub> Ru <sub>30</sub>                   | 95.0                                                                                         | 55.6                                        | [S4]      |
| RuCo(1:1)/g-Al <sub>2</sub> O <sub>3</sub>              | 35.9 <sup>b</sup>                                                                            | 47.0                                        | [S5]      |
| Cu <sub>0.72</sub> Co <sub>0.18</sub> Mo <sub>0.1</sub> | 119.0                                                                                        | 45.0                                        | [S6]      |
| Co/PCN                                                  | 82.04                                                                                        | -                                           | [S7]      |
| AuCo/NCX-1                                              | 42.1                                                                                         | 31.92                                       | [S8]      |
| CuCo@MIL-101                                            | 19.6                                                                                         | -                                           | [S9]      |
| CoPd/C                                                  | 27.7 <sup>c</sup>                                                                            | 27.5                                        | [S10]     |
| CoRh@PVP                                                | 154                                                                                          | 42.7                                        | [S11]     |
| Ru@Co/CCF                                               | 139.59 <sup>c</sup>                                                                          | 57.02                                       | [S12]     |
| CoCu-BCs/GO                                             | 72.4                                                                                         | 47.8                                        | [S13]     |
| Co <sub>4</sub> N-Co <sub>3</sub> O <sub>4</sub> @C     | 79.0                                                                                         | 28.8                                        | [S14]     |
| CoP-CoO/NCDs                                            | 89.6                                                                                         | 41                                          | [S15]     |
| ZIF-67@Co                                               | 112.3                                                                                        | -                                           | [S16]     |
| Co <sub>0.7</sub> Ni <sub>0.3</sub>                     | 35.3                                                                                         | 23.6                                        | [S17]     |
| Co@Co <sub>2</sub> Mo <sub>3</sub> O <sub>8</sub>       | 17.3                                                                                         | 51.8                                        | [S18]     |
| CuCo <sub>2</sub> O <sub>4</sub>                        | 104.0                                                                                        | 22.6                                        | [S19]     |
| Cu <sub>0.5</sub> @Co <sub>0.5</sub> -MOF/5             | 130.0                                                                                        | 26.5                                        | [S20]     |
| Co/C <sub>3</sub> N <sub>4</sub> -540                   | 83.3                                                                                         | -                                           | [S21]     |
| Cu@Co/rGO                                               | 8.7                                                                                          | 51.3                                        | [S22]     |
| Co <sub>30</sub> Pd@TUNS                                | 130.37                                                                                       | 25.8                                        | this work |

<sup>a</sup> GO = graphene oxide;

<sup>b</sup> TOF value is obtained at 323 K;

<sup>c</sup> TOF value is obtained at 303 K.

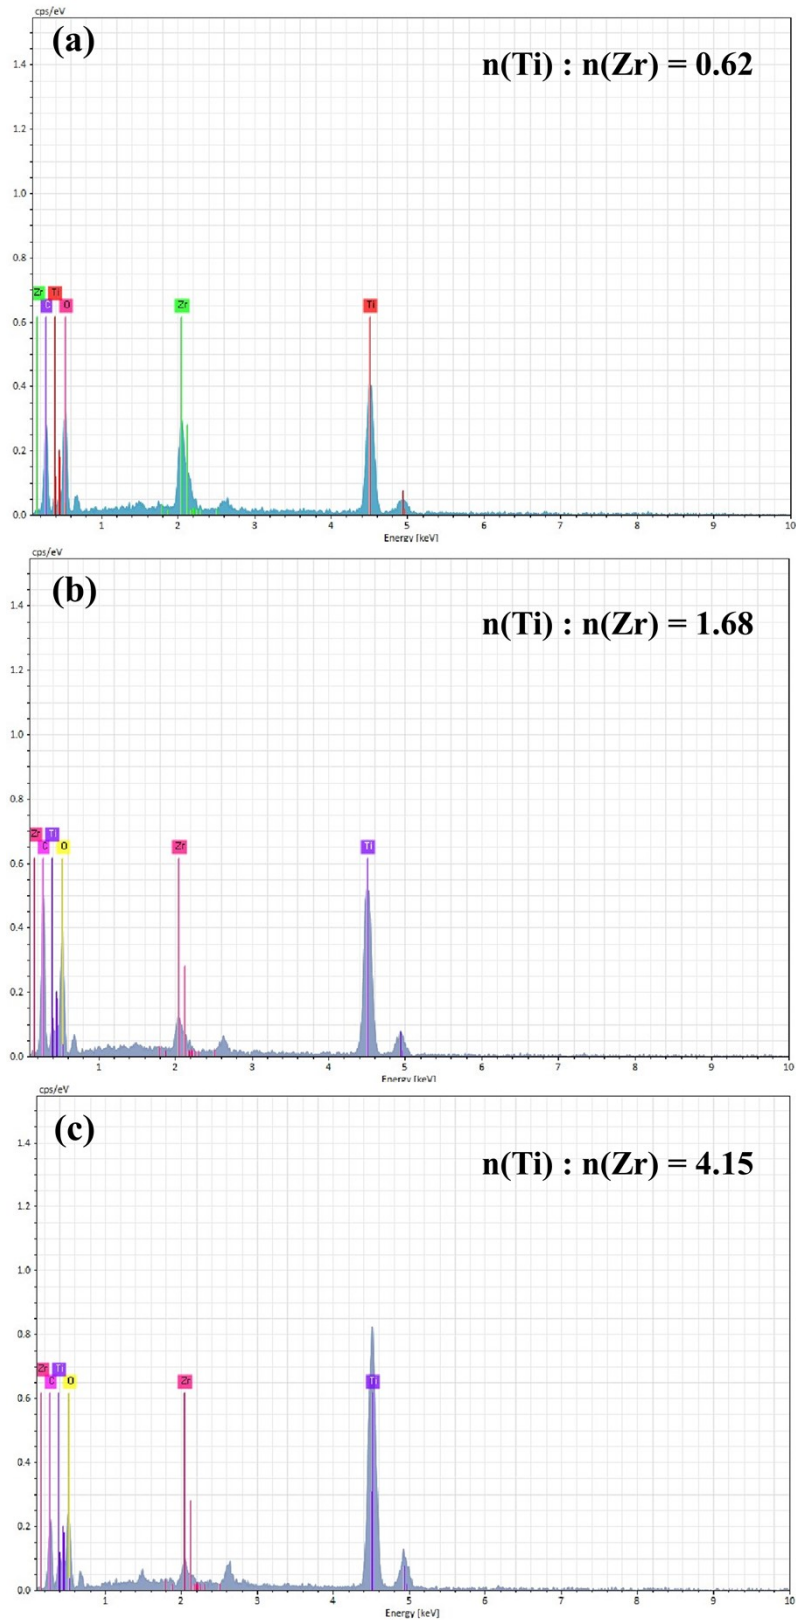

**Fig. S1** EDS patterns of composites with different ratios of  $\text{Ti}_3\text{C}_2$  to  $\text{UiO-66-NH}_2$ . (a) TUNS-*l*, (b) TUNS, and (c) TUNS-*m*.

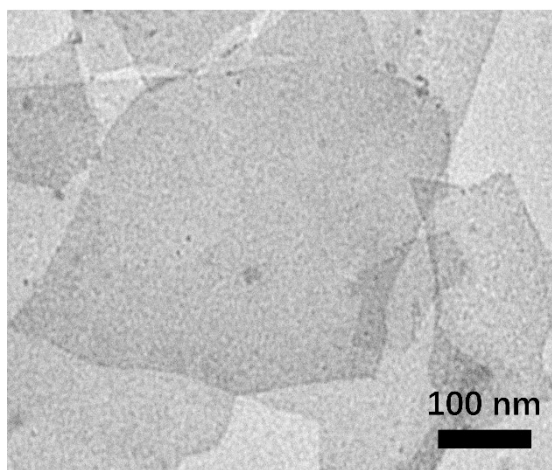

**Fig. S2** TEM image of Ti<sub>3</sub>C<sub>2</sub> nanosheets.

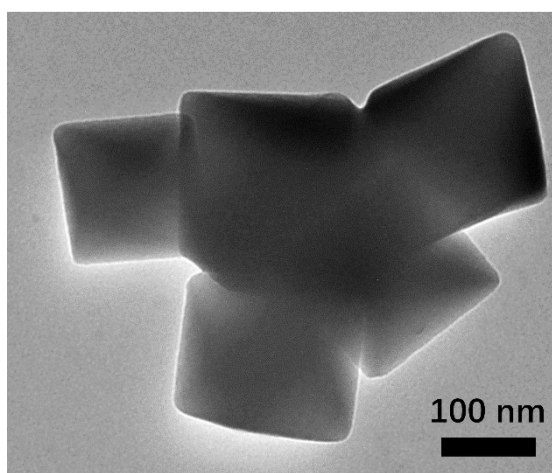

**Fig. S3** TEM image of UiO-66-NH<sub>2</sub>.

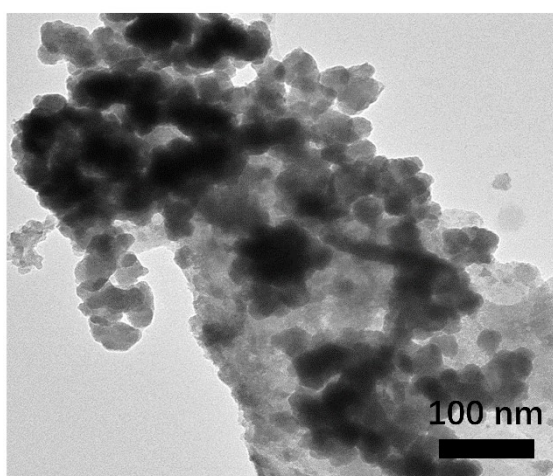

**Fig. S4** TEM image of TUNS.

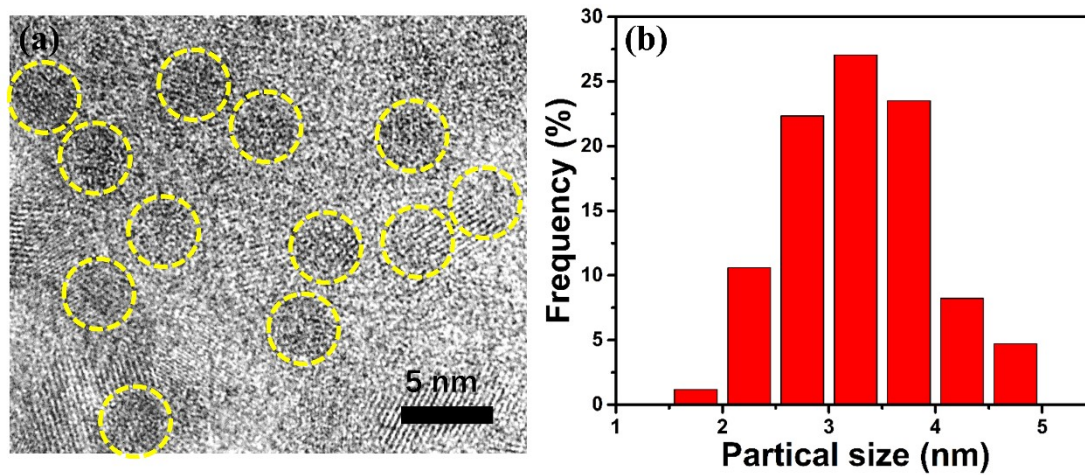

Fig. S5 (a) HRTEM image, and (b) metal NPs size-distribution histogram of  $\text{Co}_{30}\text{Pd@TUNS}$ .

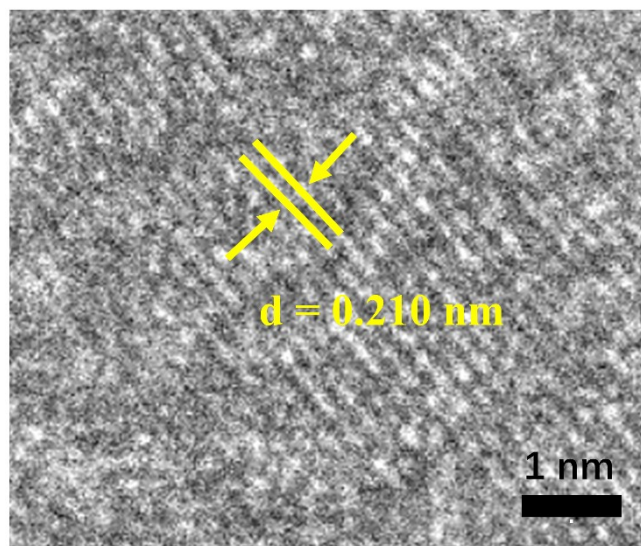

Fig. S6 HRTEM image of  $\text{Co}_{30}\text{Pd@TUNS}$ .

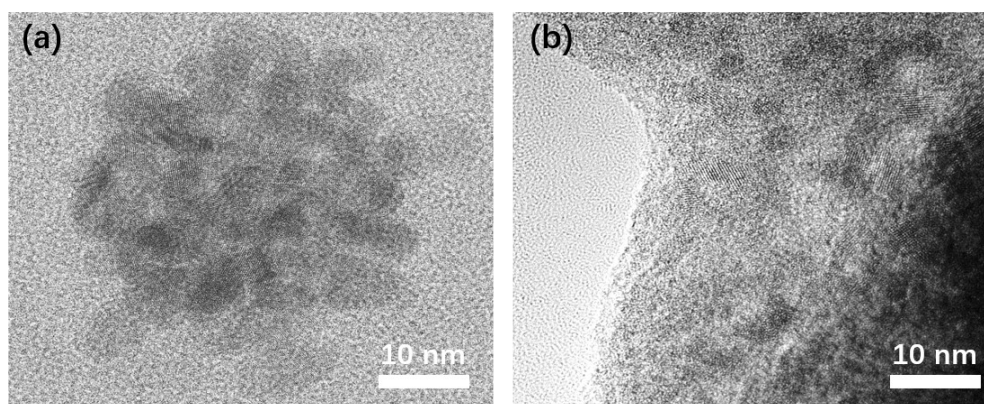

Fig. S7 HRTEM image of (a)  $\text{Co}_{30}\text{Pd/TUNS}$  and (b)  $\text{Co}_{30}\text{Pd@TUNS}$ .

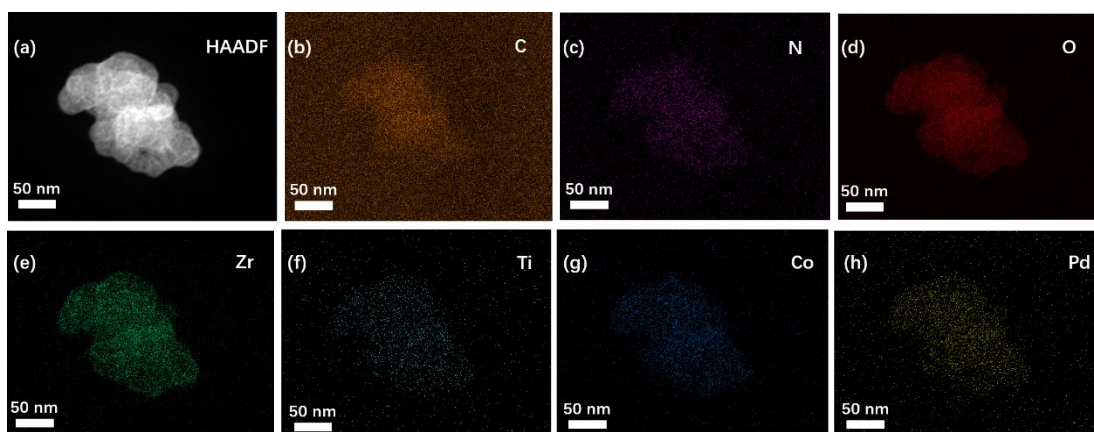

Fig. S8 Elemental mappings of  $\text{Co}_{30}\text{Pd}@TUNS$ .

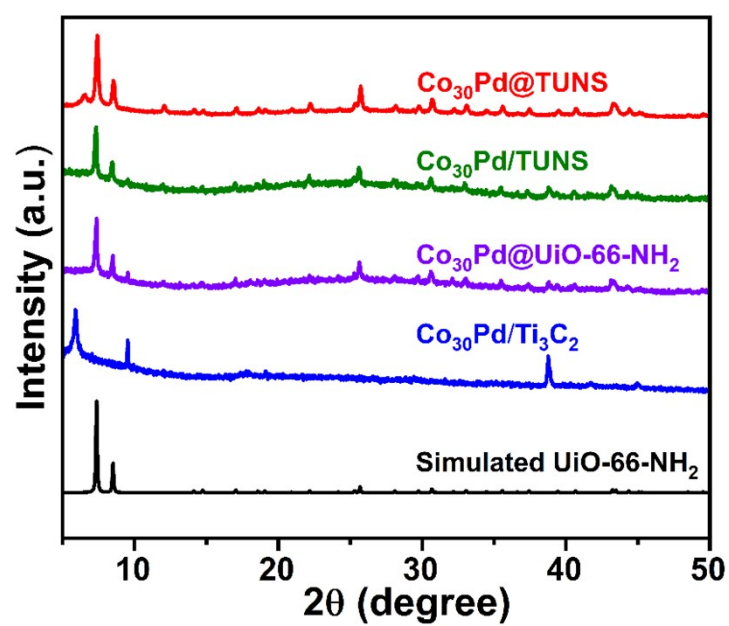

Fig. S9 PXRD patterns of the as-synthesized samples with different support.

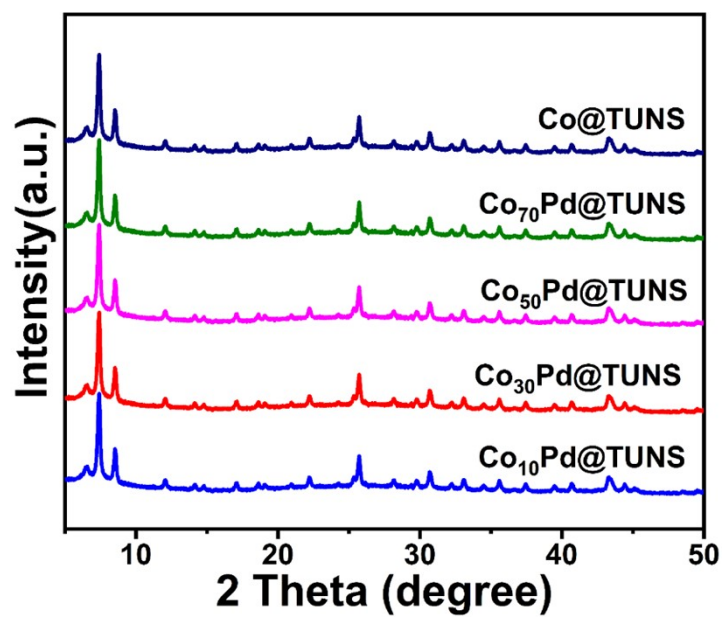

Fig. S10 PXRD patterns of the as-synthesized samples with various ratios of Pd and Co.

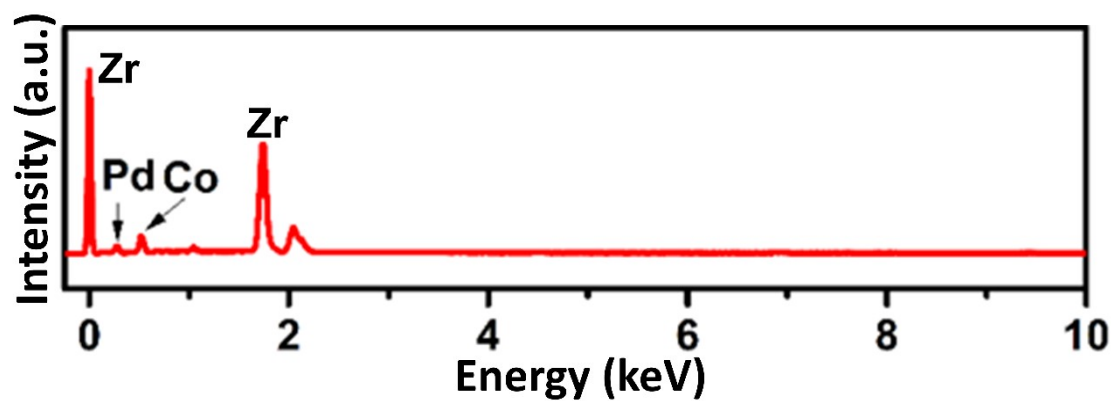

Fig. S11 EDS patterns of Co<sub>30</sub>Pd@TUNS.



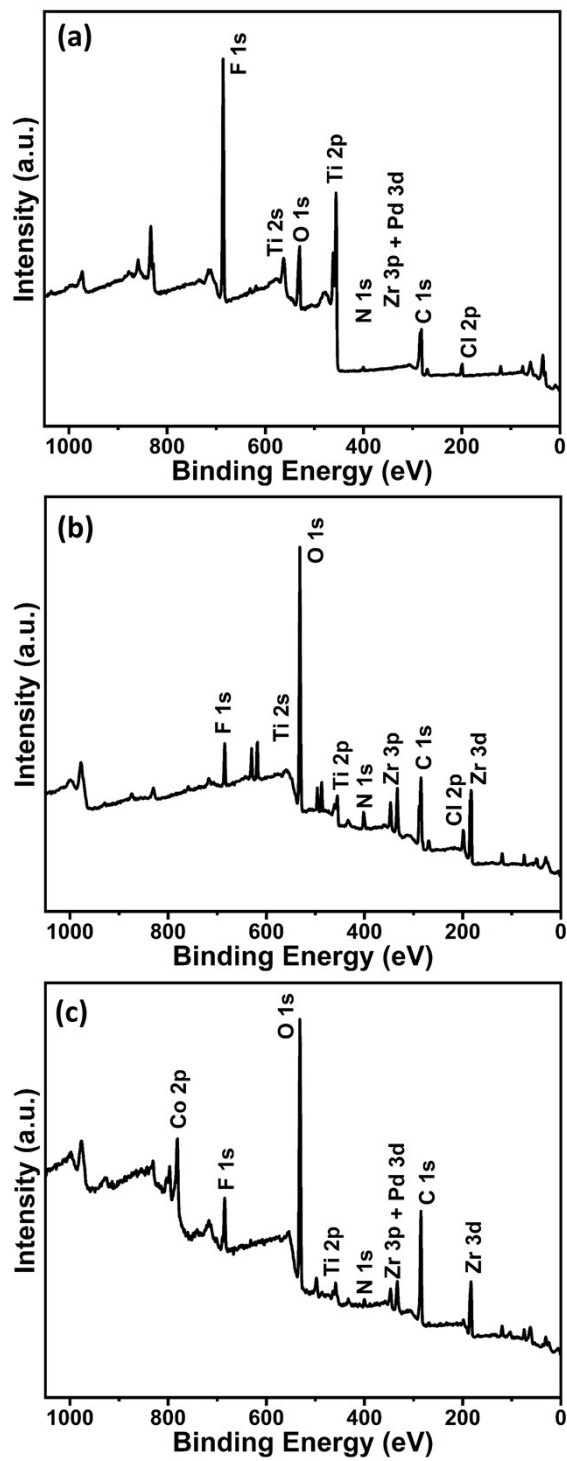

**Fig. S12** XPS survey spectrum of (a)  $Ti_3C_2$ , (b) TUNS, and (c)  $Co_{30}Pd@TUNS$ .

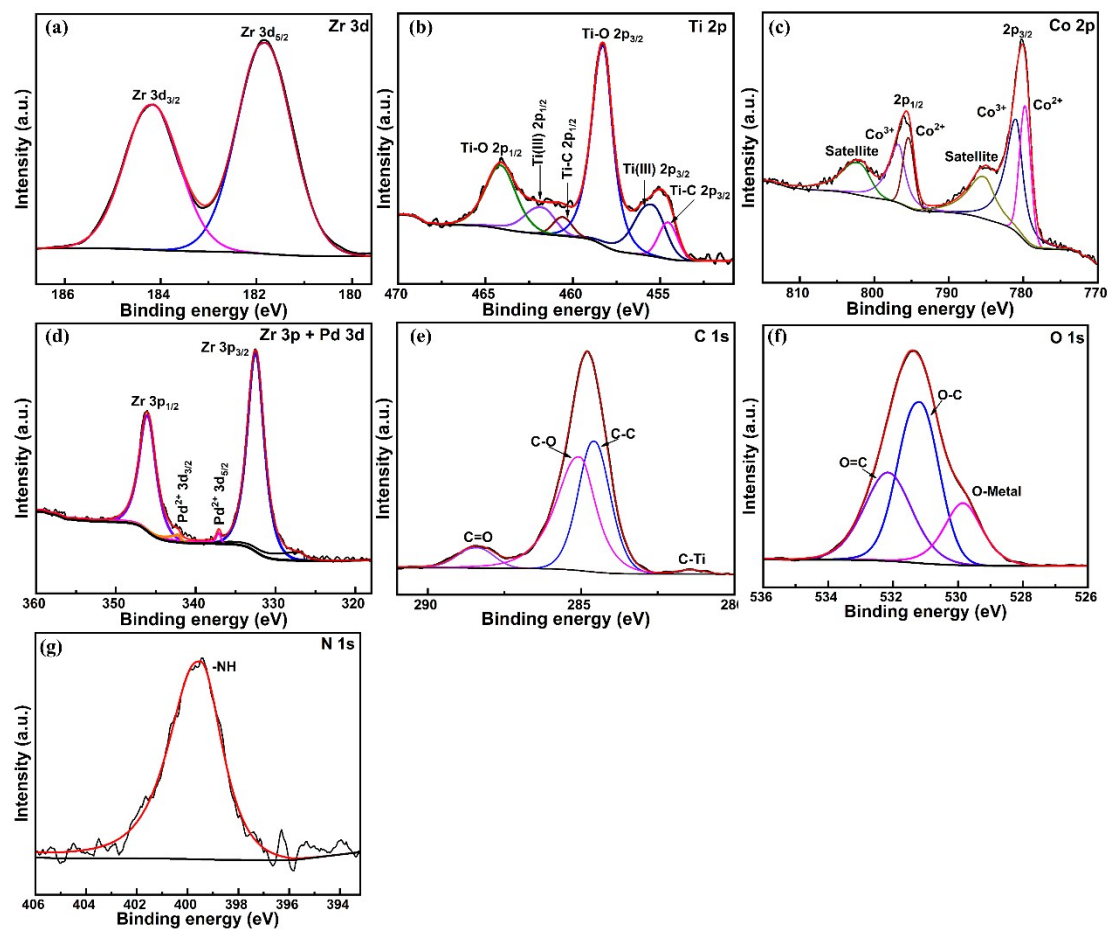

**Fig. S13** The high-resolution XPS spectra of Co<sub>30</sub>Pd@TUNS (a) Zr 3d, (b) Ti 2p, (c) Co 2p, (d) Zr 3d + Pd 3d, (e) C 1s, (f) O 1s, and (g) N 1s.

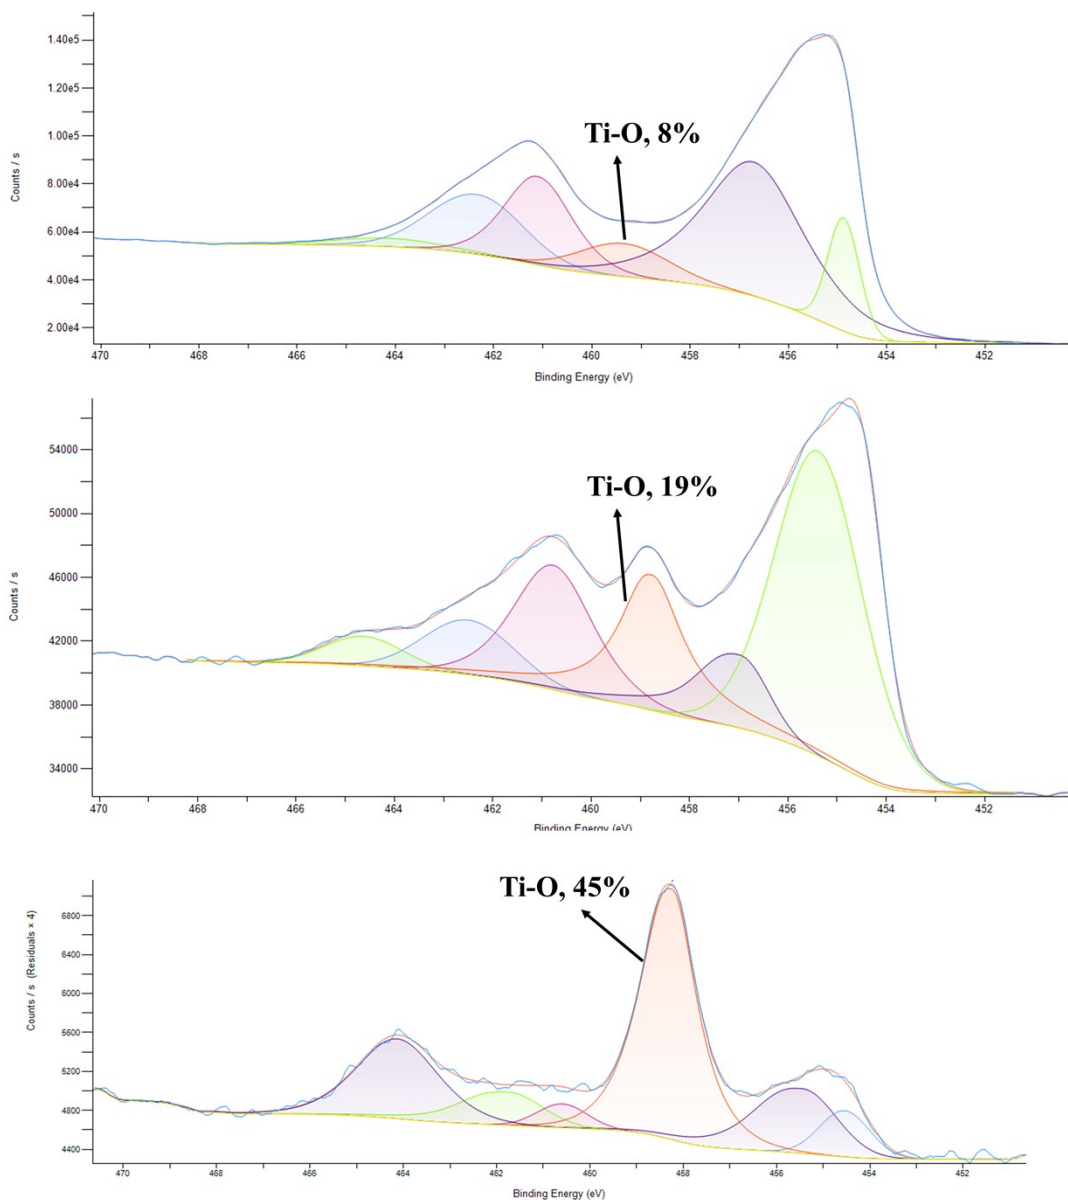

**Fig. S14** The high-resolution XPS spectra of Ti 2p in (a)  $\text{Ti}_3\text{C}_2$ , (b) TUNS, and (c)  $\text{Co}_{30}\text{Pd}@TUNS$ . Note: the Ti-O concentration was estimated by calculating the area ratio of this peak to all peaks.

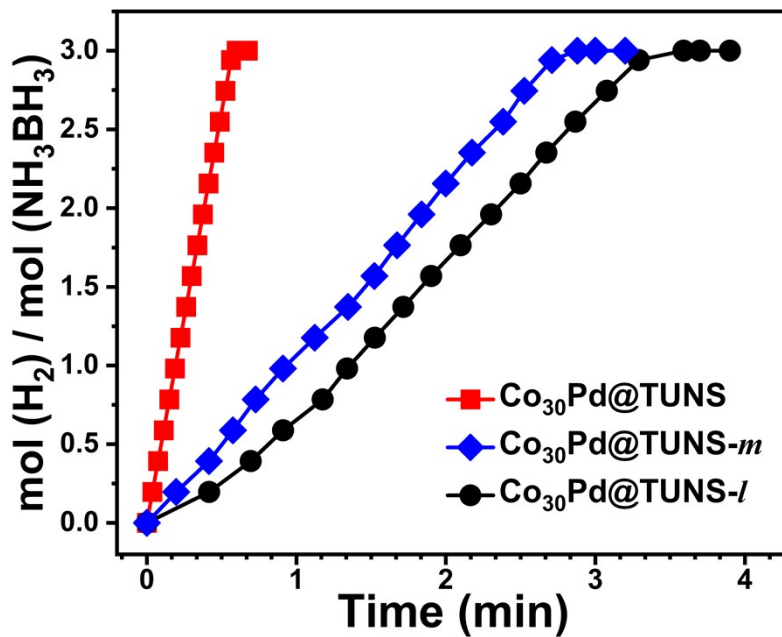

Fig. S15 Time courses for hydrogen production from AB over catalyst under the light irradiation of 300 W Xe lamp at 298 K.

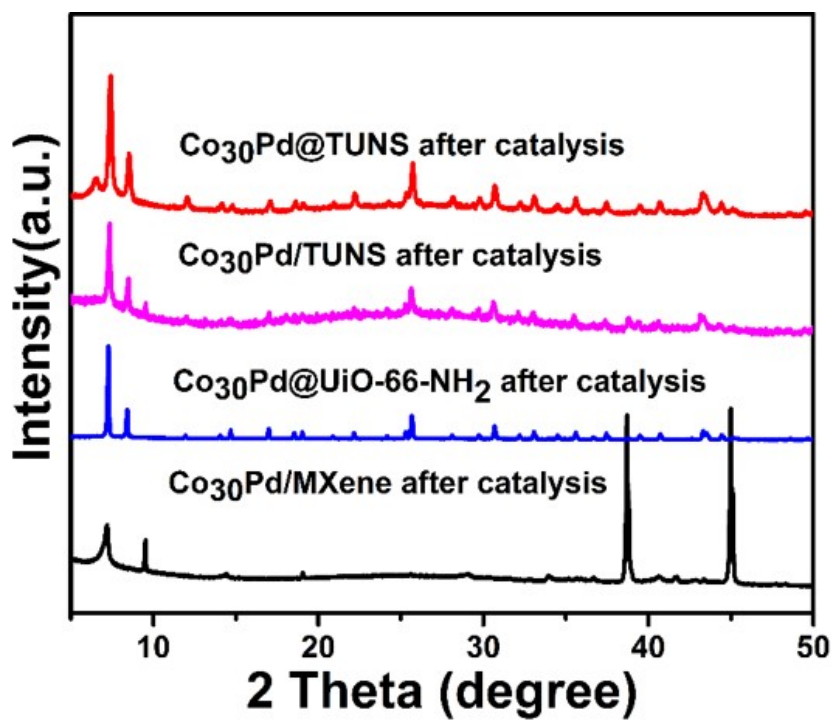

Fig. S16 XRD patterns of the composites after catalysis.

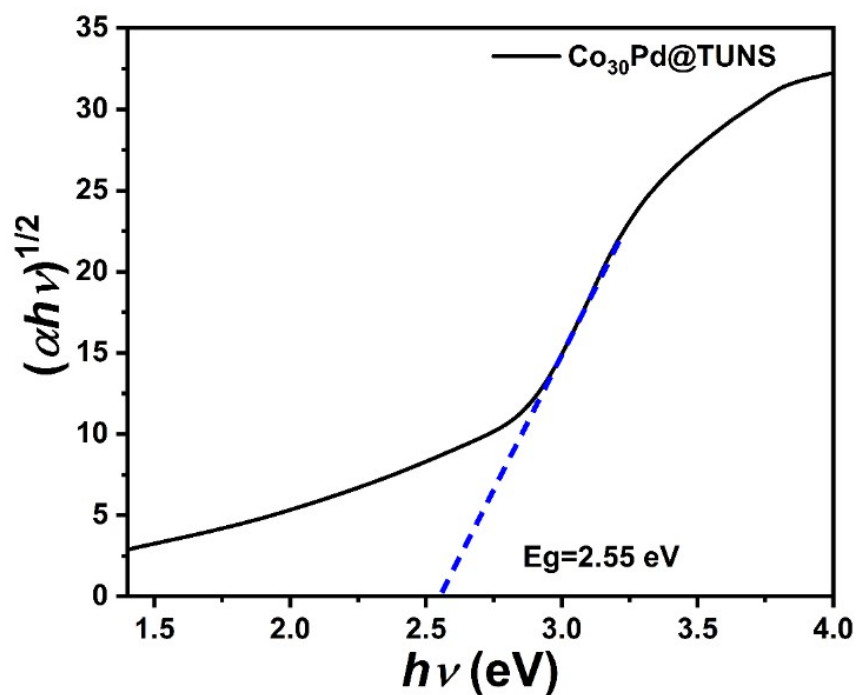

**Fig. S17** The Tauc plot of Co<sub>30</sub>Pd@TUNS. The plot has a steep region, in which the linear increase of light absorption with increasing energy. The band gap energy is deduced by the x-axis intersection point of the linear fitting according to the equation of  $(\alpha h\nu)^{1/2} = B(h\nu - E_g)$ , where  $\alpha$  refers to the absorption coefficient of the material,  $B$  is a constant,  $h$  is the Planck constant,  $\nu$  is the photon's frequency, and  $E_g$  is the band gap energy.

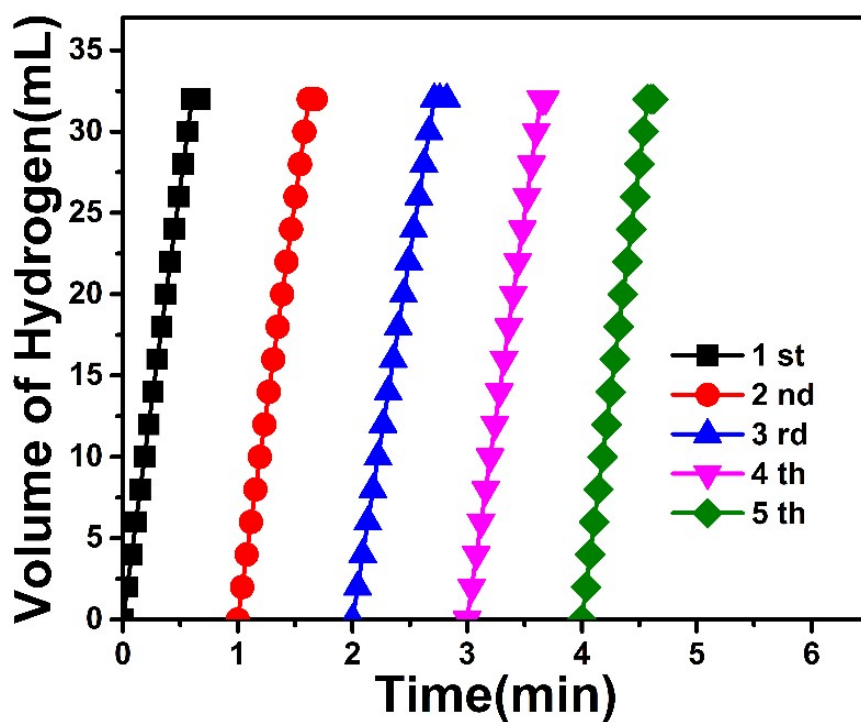

**Fig. S18** Recyclability test for AB (15.5 mg) dehydrogenation over Co<sub>30</sub>Pd@TUNS (15 mg) under the irradiation of 300 W Xe lamp.

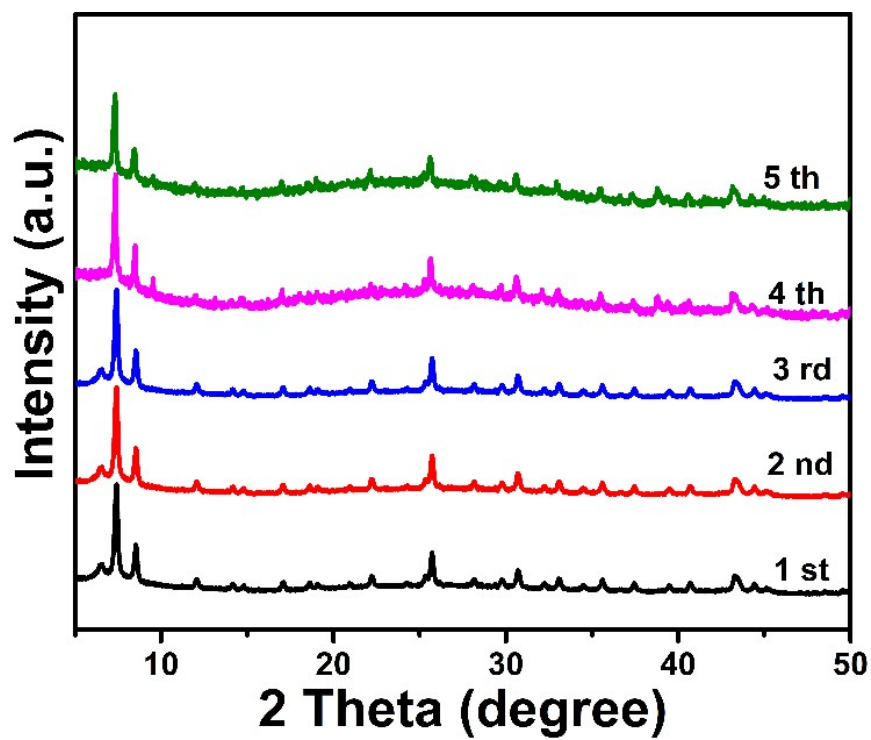

Fig. S19 XRD patterns of Co<sub>30</sub>Pd@TUNS after five cycles.

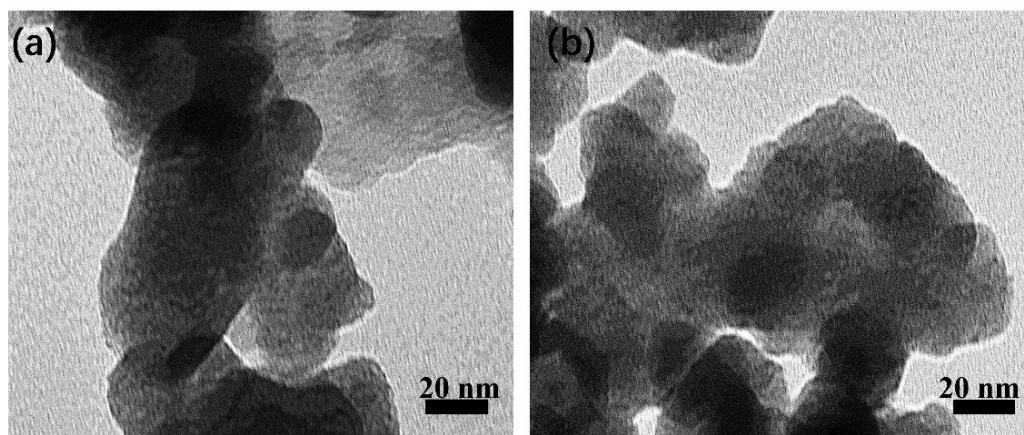

Fig. S20 TEM image of Co<sub>30</sub>Pd@TUNS (a) before first run, and (b) after fifth run.

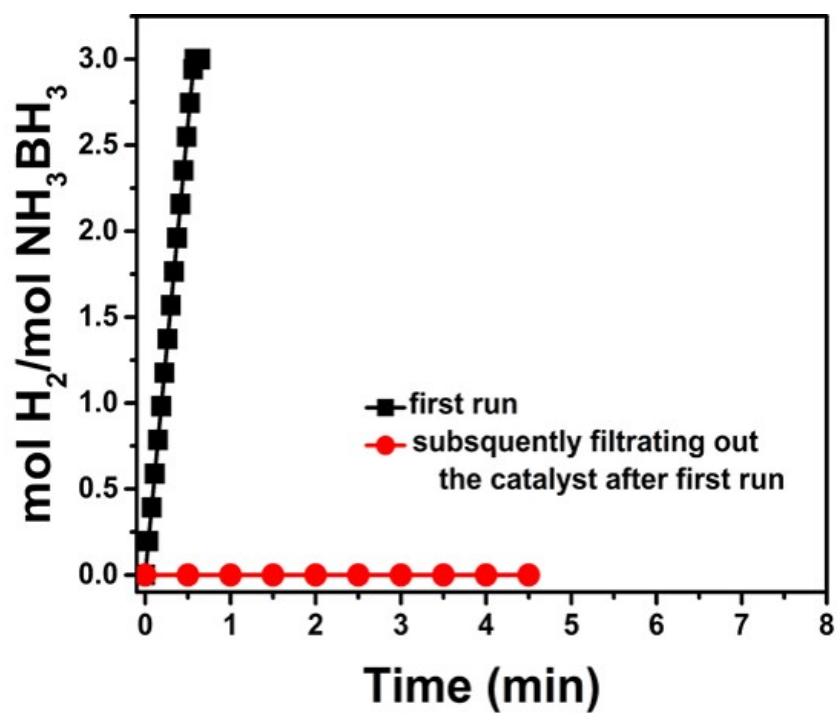

Fig. S21 Plots of time versus conversion of hydrogen generation from ammonia borane catalyzed by filtrating out  $\text{Co}_{30}\text{Pd}@TUNS$  catalyst after the first run at 298 K.

## References

- [S1] Hu J, Chen Z, Li M, Zhou X, Lu H. *ACS Appl Mater Interfaces* 2014;6:13191.
- [S2] Liu T, Wang QT, Sun YH, Zhao M. *J Nanosci Nanotechnol* 2019;19:7392.
- [S3] Feng K, Zhong J, Zhao B, Zhang H, Xu L, Sun X, et al. *Angew Chem Int Ed* 2016;55:11950.
- [S4] Can H, Can S, Ebiri R, Metin Ö. *New J Chem* 2022;46:12120-31.
- [S5] Rachiero GP, Demirci UB, Miele P. *Int J Hydrogen Energy* 2011;36:7051-65.
- [S6] Yao Q, Yang K, Hong X, Chen X, Lu ZH. *Catal Sci Technol* 2018;8:870-7.
- [S7] Zhang S, Xu J, Cheng H, Zang C, Bian F, Sun B, et al. *ChemSusChem* 2020;13:5264-72.
- [S8] Guo L, Gu X, Kang K, Wu Y, Cheng J, Liu P, et al. *J Mater Chem* 2015;3:22807-15.
- [S9] Li J, Zhu QL, Xu Q. *Catal Sci Technol* 2015;5:525-30.
- [S10] Sun D, Mazumder V, Metin Ö, Sun S. *ACS Nano* 2011;5:6458-64.
- [S11] Rakap M. *Renew Energ* 2020;154:1076-82.
- [S12] Yang J, Cui Z, Ma J, Dong Z. *Int J Hydrogen Energy* 2018;43:1355-64.
- [S13] Y. Chen, K. Wang, K. Nie, J. Wang, S. Wang, K. Feng, J. Zhong, *Chem. Eng. J.* 2023, 451, 138931.
- [S14] S. Guan, Y. Liu, H. Zhang, H. Wei, T. Liu, X. Wu, H. Wen, R. Shen, S. Mehdi, X. Ge, C. Wang, B. Liu, E. Liang, Y. Fan, B. Li, *Small* 2022, 18, 2107417.
- [S15] H. Wu, Y. Cheng, B. Wang, Y. Wang, M. Wu, W. Li, B. Liu, S. Lu, *J. Energy Chem.* 2021, 57, 198.
- [S16] W. Wang, M. Liang, Y. Jiang, C. Liao, Q. Long, X. Lai, L. Liao, *Mater. Lett.* 2021, 293, 129702.
- [S17] X. Su, S. Li, *Int. J. Hydrogen Energy* 2021, 46, 14384.
- [S18] J. He, Z. Huang, W. Chen, X. Xiao, Z. Yao, Z. Liang, L. Zhan, L. Lv, J. Qi, X. Fan, L. Chen, *Chem. Eng. J.* 2021, 431, 133697.
- [S19] Y. Feng, J. Liao, X. Chen, H. Wang, B. Guo, H. Li, L. Zhou, J. Huang, H. Li, *J. Alloys Compd.* 2021, 863, 158089.
- [S20] W. Xu, W. Li, H. Wen, J. Ding, Y. Liu, W. Li, B. Li, *Appl. Catal., B* 2021, 286, 119946.
- [S21] H. Zhang, X. Gu, J. Song, N. Fan, H. Su, *ACS Appl. Mater. Interfaces* 2017, 9, 32767.
- [S22] Y. Du, N. Cao, L. Yang, W. Luo, G. Cheng, *New J. Chem.* 2013, 37, 3035.
